1 **High diversity in the regulatory region of Stx-converting bacteriophage**  
2 **genomes**

3

4

5 Annette Fagerlund<sup>1</sup>, Marina Aspholm<sup>2</sup>, Grzegorz Węgrzyn<sup>3</sup> and Toril Lindbäck<sup>2\*</sup>

6

7 <sup>1</sup>Nofima, Norwegian Institute of Food, Fisheries and Aquaculture Research, Ås, Norway

8 <sup>2</sup>Department of Paraclinical Sciences, Faculty of Veterinary Medicine, Norwegian University of  
9 Life Sciences, Ås, Norway

10 <sup>3</sup>Department of Molecular Biology, Faculty of Biology, University of Gdańsk, Gdańsk, Poland

11

12 \*Corresponding author

13

14 Running Title: Regulatory region of Stx phages

15

16 Keywords: EHEC, Stx phage, bacteriophage genetics, lysogen, lytic, phage replication

17

18

19

20

21

22 Word count Abstract: 232 words. Word count Importance: 46 words

23 Word count text (Introduction, Results, Discussion, and Materials & Methods): 3661 words

24 **ABSTRACT** Shiga toxin (Stx) is the major virulence factor of enterohemorrhagic *Escherichia*  
25 *coli* (EHEC), and the *stx* genes are carried by temperate bacteriophages (Stx phages). The switch  
26 between lysogenic and lytic life cycle of the phage, which is crucial for Stx production and for  
27 severity of the disease, is regulated by the CI repressor. CI maintain latency by preventing  
28 transcription of the replication proteins. Three EHEC phage replication units (Eru1-3) in addition  
29 to the classical lambdoid replication region have been described previously, and Stx phages  
30 carrying the Eru1 replication region were associated with highly virulent EHEC strains. In this  
31 study, we have classified the Eru replication region of 419 Stx phages. In addition to the  
32 lambdoid replication region and the three already described Erus, ten novel Erus (named Eru4 to  
33 Eru13) were detected. The lambdoid type, Eru1, Eru4 and Eru7 seem to be widely distributed in  
34 Western Europe. Notably, EHEC strains involved in severe outbreaks in England and Norway  
35 carry Stx phages with Eru1, Eru2, Eru5 and Eru7 replication regions. Phylogenetic analysis of CI  
36 repressors from Stx phages revealed eight major clades that largely separate according to Eru  
37 type. The classification of replication regions and CI proteins of Stx phages provides an  
38 important platform for further studies aimed to assess how characteristics of the replication  
39 region influence the regulation of phage life cycle and, consequently, the virulence potential of  
40 the host EHEC strain.

41 **IMPORTANCE** EHEC is an emerging health challenge worldwide and outbreaks caused by this  
42 pathogen tend to be more frequent and severe. Increased knowledge on how characteristics of the  
43 replication region influence the virulence of *E. coli* may be used for more precise identification  
44 of high-risk EHEC strains.

45

46

## 47 INTRODUCTION

48 Enterohemorrhagic *Escherichia coli* (EHEC) is an important foodborne pathogen, responsible  
49 for disease in humans ranging from uncomplicated diarrhea to severe conditions such as  
50 hemorrhagic colitis and hemolytic uremic syndrome (HUS). EHEC is an emerging health  
51 challenge worldwide and outbreaks caused by this pathogen tend to become more frequent and  
52 severe: WHO has estimated that 10% of patients with EHEC infection develop HUS. Since the  
53 first major EHEC outbreak in 1982, caused by serotype O157:H7, the world has experienced  
54 multiple outbreaks of EHEC disease involving other serotypes than O157:H7 and new variants  
55 are constantly emerging (1, 2). Shiga toxin (Stx) is the major virulence factor of EHEC, and it  
56 exists in two distinct forms, Stx1 and Stx2. Each form comprises several subtypes (3) where  
57 some subtypes such as Stx2a are associated with severe disease while Stx2c is considered less  
58 potent (4, 5).

59 The genes encoding Stx are carried by temperate bacteriophages (Stx phages). After infection,  
60 Stx phages follow either a lysogenic or lytic pathway. The lysogenic pathway involves  
61 integration of phage DNA into the host genome and replication of the phage genetic material  
62 along with the chromosome of the host cell. The lytic pathway leads to proliferation of the Stx  
63 phage, death of the host bacterial cell and release of new phage particles (6). The proliferation of  
64 Stx phages is also accompanied by production and release of substantial amounts of Stx toxin  
65 (7). As the amount of produced Stx influences the severity of the disease, the mechanisms  
66 regulating the switch from lysogenic to lytic life cycle is highly relevant for the pathogenicity of  
67 the host *E. coli* strain.

68 Since the first sequenced Stx phages shared substantial genomic similarity to phage lambda it has  
69 been assumed that they behave similarly (8, 9). The increasing availability of whole genome  
70 sequences has revealed that Stx-encoding prophages are very diverse and, sometimes, exhibit  
71 only limited similarity towards phage lambda (10). We have previously reported Stx phages with  
72 non-lambdoid replication regions and named the regions Eru (EHEC phage replication unit) (10).  
73 The non-lambdoid Stx phages completely lack the *O* and *P* genes, encoding proteins involved in  
74 replication initiation of the lambdoid phage genome, and instead carry genes which have  
75 previously not been described in connection to replication of Stx phages. Three non-lambdoid  
76 Stx phage replications, Eru1-3, have so far been described (10). One of the Eru types, Eru1, is  
77 carried by the highly pathogenic EHEC strains that caused the Norwegian O103:H25 outbreak in  
78 2006 and the large O104:H4 outbreak in Europe in 2011. It was also shown that Eru1 phages  
79 exhibited a less stable lysogenic state than the classical lambdoid Stx phages, which could  
80 increase the pathogenicity of the host *E. coli* strain (10). The majority of EHEC strains carrying  
81 Eru1, Eru2 and Eru3 type of Stx phages were US isolates whose genome sequences were  
82 submitted to NCBI databases by the United State Department of Agriculture, the US Food and  
83 Drug Administration, and the Food-borne Pathogen Omics Research Center.

84 Despite the high genetic diversity among Stx phage genomes, the phage replication region and  
85 the lysis-lysogeny regulatory systems are always located upstream and in the vicinity to the *stx*  
86 gene (11). This region mediates the switch between repression and induction of the prophage,  
87 and the mechanisms regulating these events have been studied in detail in phage lambda. The  
88 key elements responsible for regulating the life cycle of phage lambda are the gene encoding  
89 repressor CI (*cI*), the promoter binding the CI repressor and the adjacent upstream genes,  
90 transcribed in the opposite direction of *cI* (Fig. 1) (12, 13). The lambda CI repressor

91 downregulates expression of genes involved in production of new phage particles, i.e., the lytic  
92 cycle, by specific binding to the promoter region of the adjacent genes encoding the O and P  
93 proteins which initiate replication of the lambda genome (14). The crystal structure of CI has  
94 been solved and revealed that the protein is functional as a homodimer and that repression occurs  
95 when two subunits bind cooperatively to adjacent operator sites on the DNA (15). The C-  
96 terminal domain mediates the dimer formation and the dimer-dimer interactions enable CI to  
97 bind cooperatively to two or more operator sites (16, 17) while the N-terminal domain contains a  
98 helix-turn-helix DNA-binding domain (18, 19). Upon DNA damage, the SOS-response protein  
99 RecA becomes activated and may in lysogenic cells stimulate autocleavage of CI (20). Cleaved  
100 CI can no longer bind to DNA and repression of the promoters in the replication module is thus  
101 relieved.

102 Some EHEC strains appear more virulent than others and the type of Stx produced is known to  
103 contribute significantly to the pathogenicity of the EHEC strain (5) but the amount of toxin  
104 produced should also be considered. The increasing number of outbreaks of gastrointestinal  
105 disease and HUS caused by EHEC have stimulated studies on the Stx phages to better  
106 understand their contribution to the pathogenicity of the host *E. coli* strain. However, there is still  
107 very limited knowledge on how the different types of replication regions seen among the Stx  
108 phages influences the stability of the lysogenic state and the switch to lytic cycle. In this study,  
109 we have classified the CI repressor sequences of 260 Stx phages into clade I-VIII and their  
110 replication regions into 13 Eru types to provide a platform for further studies of how the genetic  
111 structure of the Stx prophages influences the virulence potential of the host EHEC strain.

112

## 113 **RESULTS**

114 Eru types were defined by the identity of the proteins encoded by the two genes located directly  
115 upstream and in opposite direction of *cI*. Four novel Eru phage types (Eru4-7) were detected  
116 among 120 Stx-converting phage genomes retrieved from NCBI virus database (Fig. 2; Table S1  
117 in supplemental material), while an additional six novel Eru types, Eru8 to Eru13, were detected  
118 among 299 genome sequences obtained from ten examined NCBI BioProjects (Fig. 2; Table S2  
119 in supplemental material). Eru2 and Eru3, described in a previous study, both carry genes  
120 encoding a protein of unknown function and a helicase directly upstream of *cI* (10). However,  
121 since the two unknown proteins share a low sequence identity (10%) phages carrying these  
122 protein combinations were still assigned to different Eru types (10). Phages representing each  
123 Eru type is listed in Table 1 as reference phages for each Eru type. The distribution of Eru types  
124 found among the 120 sequenced Stx phages are shown in Table 2. The relatively high number of  
125 phage genomes belonging to Eru2, Eru3 and Eru7 could be due to a bias related to the number of  
126 deposited sequences from different studies (Table S1 in supplemental material).

### 127 **Distribution of Eru types among Stx phages from Western Europe**

128 The national distribution of Eru types found among 299 identified contigs carrying both *stx* and  
129 *cI* from ten European BioProjects is shown in Table 3. The distribution of Eru types indicates  
130 that the lambdaoid and the Eru1, 4 and 7 phage types are among the most common types of Stx  
131 phages in Europe, and that Eru7 appears to be particularly widespread.

132

## 133 **The Eru proteins**

134 All Eru phages carry genes encoding different types of DNA binding proteins, such as helicases,  
135 primases, or other helix-turn-helix (HTH) motif proteins, in the first and/or second position  
136 directly upstream of *cI* (Fig. 2). Eru6, Eru7 and Eru9 phages carry genes encoding proteins of the  
137 Phage\_pRha protein family (pfam09669) directly upstream of *cI* (Fig. 2). The Rha domain,  
138 which contain a winged helix-turn-helix DNA-binding motif, is also found in other temperate  
139 phages where it has been suggested to have phage regulatory function (21, 22). Some of the Rha  
140 proteins also contain the Ash domain (PF10554), which is present in the ASH protein of  
141 bacteriophage P4. However, no function has so far been assigned to this domain (22). Eru4, and  
142 the previously described Eru2 and Eru3 (10), encode proteins of unknown function directly  
143 upstream of *cI* (Fig. 2). However, there are no similarities between these proteins, and they do  
144 not share any previously described protein domains. The primases encoded by genes carried by  
145 Eru1, Eru5 and Eru10 phages do not share any sequence similarities (<10 % amino acid  
146 identity). The amino acid sequence of the putative helicases encoded by Eru4 and Eru12 are 97%  
147 identical and they both share the AAA motif (PF13604) with the Eru1 helicase (10). However,  
148 the overall sequence homology between the Eru4 and Eru12 helicases and the Eru1 helicase are  
149 low (<10 % amino acid identity).

150 Genes encoding HTH domain proteins are found in either the first or second position directly  
151 upstream of *cI* in Eru5, Eru6, Eru8, Eru11 and Eru13 (Fig. 2). The HTH proteins of Eru5 and  
152 Eru6 are 50% identical with a coverage of 66%, the HTH proteins of Eru8 and Eru13 are 59%  
153 identical over the total protein sequence, and all five proteins exhibit the HTH\_36 motif  
154 (PF13730). The HTH proteins of Eru6 and Eru13 also share a motif (PF13814) which is found in  
155 protein families essential for relaxation and replication of plasmid DNA (23, 24). Both Eru8 and  
156 Eru11 phages carry a gene encoding a protein with homology to the bacterial toxin YdaT  
157 (PF06254) directly upstream of *cI*. However, the two Eru-encoded toxin-like proteins share only  
158 34% identity with each other. The shortest distance between *cI* and *stx* was displayed by Eru10,  
159 which only carried a bifunctional DNA primase-polymerase motif protein (PF09250) (25) and  
160 the Q antiterminator protein (26, 27) in this region. All other Eru phages also carried the gene  
161 encoding the antiterminator Q protein between *cI* and *stx*, indicating that this protein is essential  
162 for Stx phages.

## 163 **Eru types in particularly virulent EHEC**

164 Five different Eru phage types were found among Stx phages from six highly pathogenic EHEC  
165 O157:H7 strains that have caused larger outbreaks in the UK (Table 4)(28). Among this panel of  
166 phages, all carrying *stx2c* and one carrying *stx2a* are of Eru2 type. Two *stx2a* carrying phages are  
167 of the Eru5 type, while the two remaining *stx2a* phages are of types Eru1 and Eru7. The only  
168 *stx1a* carrying phage among these isolates has a lambdoid replication region. Among the 97  
169 Norwegian STEC strains in BioProject PRJEB6447, 15 strains caused HUS (29) and 13 of these  
170 strains carried *stx2* phages of Eru types 1, 2 or 7.

## 171 **The CI repressors**

172 In order to examine the correspondence between the Eru phage type and the sequence of the CI  
173 repressor proteins, a total of 260 annotated CI sequences (Table S3 in supplemental material)  
174 were extracted from the phage genomes and used to build a phylogeny (Fig. 3). This analysis  
175 grouped the CI proteins into several distinct clades, for which major clades were named I to VIII.

176 The CI protein from lambda phage (NP\_040628.1) was most closely related to the CI proteins  
177 from phages of Eru types 2 and 3, all belonging to Clade I. The CI proteins of Eru2 and Eru3  
178 phages in this clade were all identical and show an overall identity of 61% towards lambda CI.  
179 Lambda CI contains two protein domains, a HTH\_3 domain (30) and a peptidase\_S24 domain,  
180 which executes the CI autolysis (31, 32). The two domains are conserved within the CI proteins  
181 belonging to Clades I, II, IV, V, VI and VII (Fig. 4). However, the CI proteins of Clade III and  
182 YP\_009907967.1 in Clade V lack the HTH domain, while Clade VIIIa CI proteins lack the  
183 peptidase domain and instead exhibit an additional HTH domain (Fig. 4).

184 In contrast to the observed high homology between CI proteins within a clade, the homology  
185 between the clades was low (Table S4 in supplemental material). The highest CI homology was  
186 seen between Clades I and II (51%) and between Clades III and IV (60%). An amino acid  
187 sequence alignment of CI sequences from Clades I to VII is shown in Fig. 5. The alignment  
188 revealed six amino acids conserved throughout all clades, one of which was the lambda CI  
189 autocleavage residue S150 (16).

### 190 **Strong correlation between CI Clades and Eru type**

191 There is a strong coherence between CI clades and Eru types which is not unexpected in light of  
192 their neighboring location in the phage genome. CI proteins belonging to Clades III and V are  
193 almost exclusively co-present with Eru4 replication proteins and the lambdoid replication type is  
194 mostly found in connection with Clades VIb and VII (Fig. 3). Similarly, the genes encoding CI  
195 proteins belonging to Clade II are almost exclusively located directly upstream of the genes  
196 defining Eru1, while those belonging to Clade Ia are located upstream of Eru2 and Eru3 (Fig. 3).  
197 However, a specific CI clade are not necessarily restricted to a specific Eru type and may  
198 regulate expression of different Eru types (Fig. 3). CI proteins of Clades III, V and VIb are  
199 linked to the lambdoid or Eru4 types and are mainly found in Stx1 producing phages (Fig. 3).

200

## 201 **DISCUSSION**

202 The present study show that Stx phages are genetically much more diverse than previously  
203 anticipated, and this finding is important as differences in phages replication modules has been  
204 suggested to influence the stability of the lysogenic state and the pathogenic potential of the host  
205 *E. coli* strain (10). The Eru type was here defined based on the type of proteins encoded by the  
206 two genes located directly upstream of *cI*. This definition is less differentiating than the  
207 definition used by Llarena *et al.* (10) where the entire region between *cI* and *stx* was considered.  
208 However, due to the large variation of genes located between *cI* and *stx*, revealed in this study,  
209 we found that defining Eru type based on the identity of the two proximal genes set the  
210 discrimination level to an appropriate level of sensitivity.

211 Stx phages have traditionally been classified into the group of lambdoid phages based on  
212 similarity in behavior, genetic structure, and regulatory system. In phage lambda and lambdoid  
213 Stx phages, the assembly of the replication complex has been studied to detail (33) but there is so  
214 far no knowledge about the proteins involved in the replication process of Eru phages. Eru7  
215 seems to be the most widespread Eru type in Europe and Eru7 phages, together with Eru6 and  
216 Eru9, encode proteins containing Rha or Rha/Ash domains. Rha domain proteins are common  
217 among temperate bacteriophages, prophages, and large eukaryotic DNA viruses and is suggested

218 to function as a regulatory protein that is involved in controlling the switch between lytic and  
219 lysogenic lifestyle (34) but very little is known about the function of Ash domain proteins (21,  
220 22, 35). However, none of these proteins have previously been associated with replication of Stx  
221 phages and it is of great interest to examine this aspect especially since Eru7 Stx phages seems to  
222 be among the more common Eru types.

223  
224 In phage lambda and lambdoid Stx phages, the CI repressor regulates expression of the *O* and *P*  
225 replication genes (13). The *cI* gene is also present in the genomes of Eru phages suggesting that a  
226 similar regulatory mechanism is at play in non-lambdoid Stx phages. The genes located directly  
227 upstream of *cI* varies extensively between different Eru types, although most of them encode  
228 DNA binding proteins such as helicases, primases or other HTH motif proteins. When exploring  
229 the different Eru types, we observed that the amino acid sequence of the CI repressor differed  
230 substantially between Stx phages but there were also homologies which were used group them  
231 into eight major Clades (I-VIII). In phage lambda, CI represses expression of upstream genes by  
232 forming dimers which bind to specific promoter sequences and self-cleavage of CI relieves the  
233 repression (15, 20). All CI proteins belonging to Clade I-VII exhibit the self-catalytic  
234 Peptidase\_S24 domain and the lambda S150 autocleavage residue (16, 31, 36) which mediates  
235 the cleavage of CI resulting in relieve of repression of the promoters in the replication module.  
236 However, CI sequences belonging to Clade VIIIa lack this domain and it remains unexplored  
237 how this atypical CI protein is involved in regulating phage replication. Another atypical CI  
238 protein, lacking the HTH DNA-binding domain, was observed in Clade III, and the regulatory  
239 functions of this protein is also unknown. Considering the likelihood that CI is involved in  
240 regulation of upstream genes, the differences in amino acid sequence observed between CI  
241 repressors of different Eru types may reflect adaptation of binding specificities to match distinct  
242 target sequences. It is also likely that the differences observed between CI repressors may  
243 influence their regulatory network which, in turn, may influence the stability of the lysogenic  
244 state and the pathogenic potential of the host EHEC strain.

245  
246 Stx phages are known to be highly mosaic and composed of gene segments with different  
247 evolutionary histories acquired through a variety of mechanisms, such as homologous  
248 recombination, transposition, and site-specific recombination (37-39). The variation in CI protein  
249 sequence and Eru types and the different combinations of these revealed in the present study,  
250 indicates that Stx phages continuously change and that their classification may be less restricted  
251 to specific serotypes than previously anticipated (10). We have previously suggested that the  
252 Eru2 type may be restricted to serotype O157:H7 and is predominant for the less potent subtype  
253 Stx2c phages (10). However, we observed that among the 63 Eru2 phages detected in this study,  
254 fourteen were carried by *E. coli* of serotype O157:H7, while the remaining 49 phages (48 in  
255 Japanese EHEC strains (Table S1 in supplemental material) and one in a Dutch EHEC strain  
256 (PRNJA285020 strains STEC 564; Table S2 in supplemental material)) were carried by *E. coli*  
257 of serotype O121:H19. All Eru2 phages carried by O121:H19 strains encoded Stx2a, while all  
258 the O157:H7 strains carried Eru2 phages encoding Stx2c. We also observed that five of the six  
259 highly pathogenic strains of serotype O157:H7, which have caused large outbreaks in the UK  
260 carry Eru2 phages, and that four of these Eru2 phages encode Stx2c (Table 4). Although, the UK  
261 outbreak strains also do carry phages encoding the more potent Stx2a. All in all, this indicate that  
262 Eru2 phages are not restricted to hosts of serotype O157:H7 but Eru2 phages carried by this  
263 serotype predominantly encode the Stx2c subtype.

264  
265 Surprisingly, we did not observe any Eru3 type Stx phages among the European STEC strains  
266 examined during this study (Table 3). We have previously shown that Eru3 phages were carried  
267 by both serotype O157:H7 and O111 strains and often encode the potent subtype Stx2a (10). A  
268 majority of the Eru3 type of Stx phages described in the previous work were isolated in the US,  
269 indicating that this phage type may be more widespread on the American continent than in  
270 Europe.

271

272 *E. coli* may carry multiple *stx* negative prophages with similarities to Stx phages together with  
273 multiple Stx phages in its genome (40). Therefore, identification of the Eru type requires that the  
274 *stx* genes and the phage replication region is present on the same contig or scaffold. Assessment  
275 of Eru type from genome sequences generated by short read sequencing technology is often  
276 impossible due to contig breaks in the region between *cI* and *stx* (ND in Table S2 in  
277 supplemental material). Stx phages often carry repetitive tRNA encoding genes immediately  
278 upstream of the *stx* making assembly of contigs difficult in this region.

279 In the present study, we observe that the Stx2a encoding phages carried by highly virulent EHEC  
280 strains from UK (28) and the HUS causing strains from Norway (29) are of Eru1-, Eru2-, Eru5-  
281 and Eru7-types. We have previously shown that the Eru1 type is carried by highly pathogenic  
282 EHEC strains and that Eru1 phages exhibit a less stable lysogenic state than the classical  
283 lambdoid Stx phages (10). It is already well known that the outcome of EHEC disease is often  
284 more severe when the infection is caused by an *E. coli* strain producing Stx2 compared to a strain  
285 producing Stx1 (3, 5). We must, however, emphasize that the amount of toxin produced must be  
286 taken into consideration. It is therefore of great importance to gain more knowledge about how  
287 the gene content of the replication region influences regulation of the phage life cycle and,  
288 consequently, the levels of Stx produced. More research is also needed to understand how  
289 different CI repressor types react to environmental stressors such as the host immune system and  
290 antibiotic treatment and the impact of these factors on the Stx production. Importantly, this work  
291 highlights that our understanding of bacterial pathogens cannot solely be based on studies on a  
292 few model bacterial strains and/or phage types.

293

## 294 MATERIAL AND METHODS

295 A total of 120 Stx-converting phage genome sequences were retrieved from the NCBI virus  
296 database (taxid:10239) by Standard Nucleotide BLAST using the A subunit of *stx1* (M19437.1)  
297 and *stx2* (AF125520) as query sequences (August 2021) (Table S1 in supplemental material).

298 In addition, ten different bio-projects comprising European STEC strains, one Dutch  
299 (PRJNA285020), one Norwegian (PRJEB6447), one French (PRPRJNA706995), three Swiss  
300 (PRJNA680568, PRJNA694525, PRJNA438214), one English (PRJNA248042), one Italian  
301 (PRJNA666781), one German (PRJNA715185) and one Portuguese (PRJNA643688), were  
302 examined for contigs containing *stx* using BLAST as described above (Table S2 in supplemental  
303 material). The dataset contained more than 3000 STEC isolates, however, the majority of contigs  
304 were too short (<8000 bp) to contain *cI* and *stx* genes on the same contig thus only contigs larger  
305 than 8000 bp were examined. A total of 299 contigs containing the region between the CI-coding  
306 gene and the *stx* genes were identified in the dataset. The sequences were examined using



307 pDRAW and Eru types were defined by the proteins encoded by the two genes located directly  
308 upstream of *cI*. GenomeNet Motif Search (Kyoto University Bioinformatics Center) was used for  
309 detection of protein motifs (41). Erus were numbered consecutively as they were detected.

310 The 260 CI protein sequences (Table S3 in supplemental material), mainly extracted from the  
311 abovementioned nucleotide sequences, were aligned using ClustalOmega (42). A maximum  
312 likelihood tree was inferred from the alignment using IQ-TREE v1.6.12 (43). Node supports  
313 were evaluated using the option -bb for ultrafast bootstraps (44) and the VT+GT model was  
314 selected as the best evolutionary model using ModelFinder and the BIC criterion (45). Interactive  
315 Tree Of Life (iTOL) v6.4 was used for visualization (46).

316

## 317 REFERENCES

- 318 1. Bielaszewska M, Mellmann A, Zhang W, Köck R, Fruth A, Bauwens A, Peters G, Karch H. 2011.  
319 Characterisation of the *Escherichia coli* strain associated with an outbreak of haemolytic uraemic  
320 syndrome in Germany, 2011: a microbiological study. *Lancet Infect Dis* 11:671-6.
- 321 2. Rasko DA, Webster DR, Sahl JW, Bashir A, Boisen N, Scheutz F, Paxinos EE, Sebra R, Chin CS,  
322 Iliopoulos D, Klammer A, Peluso P, Lee L, Kislyuk AO, Bullard J, Kasarskis A, Wang S, Eid J, Rank D,  
323 Redman JC, Steyert SR, Frimodt-Møller J, Struve C, Petersen AM, Krogfelt KA, Nataro JP, Schadt  
324 EE, Waldor MK. 2011. Origins of the *E. coli* strain causing an outbreak of hemolytic-uremic  
325 syndrome in Germany. *N Engl J Med* 365:709-17.
- 326 3. Scheutz F, Teel LD, Beutin L, Piérard D, Buvens G, Karch H, Mellmann A, Caprioli A, Tozzoli R,  
327 Morabito S, Strockbine NA, Melton-Celsa AR, Sanchez M, Persson S, O'Brien AD. 2012.  
328 Multicenter evaluation of a sequence-based protocol for subtyping Shiga toxins and  
329 standardizing Stx nomenclature. *J Clin Microbiol* 50:2951-63.
- 330 4. Boerlin P, McEwen SA, Boerlin-Petzold F, Wilson JB, Johnson RP, Gyles CL. 1999. Associations  
331 between virulence factors of Shiga toxin-producing *Escherichia coli* and disease in humans. *J Clin*  
332 *Microbiol* 37:497-503.
- 333 5. Fuller CA, Pellino CA, Flagler MJ, Strasser JE, Weiss AA. 2011. Shiga toxin subtypes display  
334 dramatic differences in potency. *Infect Immun* 79:1329-37.
- 335 6. Zeng L, Skinner SO, Zong C, Sippy J, Feiss M, Golding I. 2010. Decision making at a subcellular  
336 level determines the outcome of bacteriophage infection. *Cell* 141:682-91.
- 337 7. Wagner PL, Acheson DW, Waldor MK. 1999. Isogenic lysogens of diverse shiga toxin 2-encoding  
338 bacteriophages produce markedly different amounts of shiga toxin. *Infect Immun* 67:6710-4.
- 339 8. O'Brien AD, Marques LR, Kerry CF, Newland JW, Holmes RK. 1989. Shiga-like toxin converting  
340 phage of enterohemorrhagic *Escherichia coli* strain 933. *Microb Pathog* 6:381-90.
- 341 9. Plunkett G, 3rd, Rose DJ, Durfee TJ, Blattner FR. 1999. Sequence of Shiga toxin 2 phage 933W  
342 from *Escherichia coli* O157:H7: Shiga toxin as a phage late-gene product. *J Bacteriol* 181:1767-  
343 78.
- 344 10. Llarena AK, Aspholm M, O'Sullivan K, Węgrzyn G, Lindbäck T. 2021. Replication Region Analysis  
345 Reveals Non-lambdoid Shiga Toxin Converting Bacteriophages. *Front Microbiol* 12:640945.
- 346 11. Pinto G, Sampaio M, Dias O, Almeida C, Azeredo J, Oliveira H. 2021. Insights into the genome  
347 architecture and evolution of Shiga toxin encoding bacteriophages of *Escherichia coli*. *BMC*  
348 *Genomics* 22:366.
- 349 12. Bednarz M, Halliday JA, Herman C, Golding I. 2014. Revisiting bistability in the lysis/lysogeny  
350 circuit of bacteriophage lambda. *PLoS One* 9:e100876.

- 351 13. Casjens SR, Hendrix RW. 2015. Bacteriophage lambda: Early pioneer and still relevant. *Virology*  
352 479-480:310-30.
- 353 14. LeBowitz JH, Zylicz M, Georgopoulos C, McMacken R. 1985. Initiation of DNA replication on  
354 single-stranded DNA templates catalyzed by purified replication proteins of bacteriophage  
355 lambda and *Escherichia coli*. *Proc Natl Acad Sci U S A* 82:3988-92.
- 356 15. Stayrook S, Jaru-Ampornpan P, Ni J, Hochschild A, Lewis M. 2008. Crystal structure of the  
357 lambda repressor and a model for pairwise cooperative operator binding. *Nature* 452:1022-5.
- 358 16. Bell CE, Frescura P, Hochschild A, Lewis M. 2000. Crystal structure of the lambda repressor C-  
359 terminal domain provides a model for cooperative operator binding. *Cell* 101:801-11.
- 360 17. Pabo CO, Sauer RT, Sturtevant JM, Ptashne M. 1979. The lambda repressor contains two  
361 domains. *Proc Natl Acad Sci U S A* 76:1608-12.
- 362 18. Nyíri K, Kóhegyi B, Micsonai A, Kardos J, Vertessy BG. 2015. Evidence-Based Structural Model of  
363 the Staphylococcal Repressor Protein: Separation of Functions into Different Domains. *PLoS One*  
364 10:e0139086.
- 365 19. Pabo CO, Lewis M. 1982. The operator-binding domain of lambda repressor: structure and DNA  
366 recognition. *Nature* 298:443-7.
- 367 20. Sauer RT, Ross MJ, Ptashne M. 1982. Cleavage of the lambda and P22 repressors by recA  
368 protein. *J Biol Chem* 257:4458-62.
- 369 21. Henthorn KS, Friedman DI. 1995. Identification of related genes in phages phi 80 and P22 whose  
370 products are inhibitory for phage growth in *Escherichia coli* IHF mutants. *J Bacteriol* 177:3185-  
371 90.
- 372 22. Iyer LM, Koonin EV, Aravind L. 2002. Extensive domain shuffling in transcription regulators of  
373 DNA viruses and implications for the origin of fungal APSES transcription factors. *Genome Biol*  
374 3:Research0012.
- 375 23. Núñez B, De La Cruz F. 2001. Two atypical mobilization proteins are involved in plasmid CloDF13  
376 relaxation. *Mol Microbiol* 39:1088-99.
- 377 24. Zou X, Caufield PW, Li Y, Qi F. 2001. Complete nucleotide sequence and characterization of  
378 pUA140, a cryptic plasmid from *Streptococcus mutans*. *Plasmid* 46:77-85.
- 379 25. Lipps G, Weinzierl AO, von Scheven G, Buchen C, Cramer P. 2004. Structure of a bifunctional  
380 DNA primase-polymerase. *Nat Struct Mol Biol* 11:157-62.
- 381 26. Goliger JA, Roberts JW. 1987. Bacteriophage 82 gene Q and Q protein. Sequence,  
382 overproduction, and activity as a transcription antiterminator in vitro. *J Biol Chem* 262:11721-5.
- 383 27. Grayhack EJ, Roberts JW. 1982. The phage lambda Q gene product: activity of a transcription  
384 antiterminator in vitro. *Cell* 30:637-48.
- 385 28. Yara DA, Greig DR, Gally DL, Dallman TJ, Jenkins C. 2020. Comparison of Shiga toxin-encoding  
386 bacteriophages in highly pathogenic strains of Shiga toxin-producing *Escherichia coli* O157:H7 in  
387 the UK. *Microb Genom* 6.
- 388 29. Haugum K, Johansen J, Gabrielsen C, Brandal LT, Bergh K, Ussery DW, Drabløs F, Afset JE. 2014.  
389 Comparative genomics to delineate pathogenic potential in non-O157 Shiga toxin-producing  
390 *Escherichia coli* (STEC) from patients with and without haemolytic uremic syndrome (HUS) in  
391 Norway. *PLoS One* 9:e111788.
- 392 30. Durante-Rodríguez G, Mancheño JM, Díaz E, Carmona M. 2016. Refactoring the λ phage  
393 lytic/lysogenic decision with a synthetic regulator. *Microbiologyopen* 5:575-81.
- 394 31. Kim B, Little JW. 1993. LexA and lambda CI repressors as enzymes: specific cleavage in an  
395 intermolecular reaction. *Cell* 73:1165-73.
- 396 32. Mo CY, Birdwell LD, Kohli RM. 2014. Specificity determinants for autoproteolysis of LexA, a key  
397 regulator of bacterial SOS mutagenesis. *Biochemistry* 53:3158-68.

- 398 33. Kozłowska K, Glinkowska M, Boss L, Gaffke L, Deptuła J, Węgrzyn G. 2020. Formation of  
399 Complexes Between O Proteins and Replication Origin Regions of Shiga Toxin-Converting  
400 Bacteriophages. *Front Mol Biosci* 7:207.
- 401 34. Bochow S, Elliman J, Owens L. 2012. Bacteriophage adenine methyltransferase: a life cycle  
402 regulator? Modelled using *Vibrio harveyi* myovirus like. *J Appl Microbiol* 113:1001-13.
- 403 35. Casjens S, Eppler K, Parr R, Poteete AR. 1989. Nucleotide sequence of the bacteriophage P22  
404 gene 19 to 3 region: identification of a new gene required for lysis. *Virology* 171:588-98.
- 405 36. Luo Y, Pfuetzner RA, Mosimann S, Paetzel M, Frey EA, Cherney M, Kim B, Little JW, Strynadka  
406 NC. 2001. Crystal structure of LexA: a conformational switch for regulation of self-cleavage. *Cell*  
407 106:585-94.
- 408 37. Hatfull GF, Hendrix RW. 2011. Bacteriophages and their genomes. *Curr Opin Virol* 1:298-303.
- 409 38. Johansen BK, Wasteson Y, Granum PE, Brynstad S. 2001. Mosaic structure of Shiga-toxin-2-  
410 encoding phages isolated from *Escherichia coli* O157:H7 indicates frequent gene exchange  
411 between lambdoid phage genomes. *Microbiology (Reading)* 147:1929-1936.
- 412 39. Smith DL, Rooks DJ, Fogg PC, Darby AC, Thomson NR, McCarthy AJ, Allison HE. 2012.  
413 Comparative genomics of Shiga toxin encoding bacteriophages. *BMC Genomics* 13:311.
- 414 40. Zhang Y, Liao YT, Salvador A, Sun X, Wu VCH. 2019. Prediction, Diversity, and Genomic Analysis  
415 of Temperate Phages Induced From Shiga Toxin-Producing *Escherichia coli* Strains. *Front*  
416 *Microbiol* 10:3093.
- 417 41. Bateman A, Birney E, Cerruti L, Durbin R, Ewinger L, Eddy SR, Griffiths-Jones S, Howe KL, Marshall  
418 M, Sonnhammer EL. 2002. The Pfam protein families database. *Nucleic Acids Res* 30:276-80.
- 419 42. Sievers F, Wilm A, Dineen D, Gibson TJ, Karplus K, Li W, Lopez R, McWilliam H, Remmert M,  
420 Söding J, Thompson JD, Higgins DG. 2011. Fast, scalable generation of high-quality protein  
421 multiple sequence alignments using Clustal Omega. *Mol Syst Biol* 7:539.
- 422 43. Nguyen LT, Schmidt HA, von Haeseler A, Minh BQ. 2015. IQ-TREE: a fast and effective stochastic  
423 algorithm for estimating maximum-likelihood phylogenies. *Mol Biol Evol* 32:268-74.
- 424 44. Hoang DT, Chernomor O, von Haeseler A, Minh BQ, Vinh LS. 2018. UFBoot2: Improving the  
425 Ultrafast Bootstrap Approximation. *Mol Biol Evol* 35:518-522.
- 426 45. Kalyaanamoorthy S, Minh BQ, Wong TKF, von Haeseler A, Jermini LS. 2017. ModelFinder: fast  
427 model selection for accurate phylogenetic estimates. *Nat Methods* 14:587-589.
- 428 46. Letunic I, Bork P. 2021. Interactive Tree Of Life (iTOL) v5: an online tool for phylogenetic tree  
429 display and annotation. *Nucleic Acids Res* 49:W293-w296.
- 430 47. Tóth I, Sváb D, Bálint B, Brown-Jaque M, Maróti G. 2016. Comparative analysis of the Shiga toxin  
431 converting bacteriophage first detected in *Shigella sonnei*. *Infect Genet Evol* 37:150-7.
- 432 48. Scotland SM, Willshaw GA, Smith HR, Rowe B. 1987. Properties of strains of *Escherichia coli*  
433 belonging to serogroup O157 with special reference to production of Vero cytotoxins VT1 and  
434 VT2. *Epidemiol Infect* 99:613-24.
- 435 49. Taylor CM, White RH, Winterborn MH, Rowe B. 1986. Haemolytic-uraemic syndrome: clinical  
436 experience of an outbreak in the West Midlands. *Br Med J (Clin Res Ed)* 292:1513-6.
- 437 50. Byrne L, Dallman TJ, Adams N, Mikhail AFW, McCarthy N, Jenkins C. 2018. Highly Pathogenic  
438 Clone of Shiga Toxin-Producing *Escherichia coli* O157:H7, England and Wales. *Emerg Infect Dis*  
439 24:2303-2308.
- 440 51. Gobin M, Hawker J, Cleary P, Inns T, Gardiner D, Mikhail A, McCormick J, Elson R, Ready D,  
441 Dallman T, Roddick I, Hall I, Willis C, Crook P, Godbole G, Tubin-Delic D, Oliver I. 2018. National  
442 outbreak of Shiga toxin-producing *Escherichia coli* O157:H7 linked to mixed salad leaves, United  
443 Kingdom, 2016. *Euro Surveill* 23.

445 **TABLES**

446 **Table 1: Accession numbers of sequences representing each Eru type**

| Name      | Representative phage**            | NCBI accession no | Stx type | Origin      | Year |
|-----------|-----------------------------------|-------------------|----------|-------------|------|
| Lambdoid* | 933W                              | NC_000924         | Stx2     | USA         | 1982 |
| Eru1*     | TL-2011c                          | NC_019442         | Stx2     | Norway      | 2006 |
| Eru2*     | TW14359                           | NC_013008         | Stx2     | USA         | 2006 |
| Eru3*     | VT2-Sakai                         | AP000422          | Stx2     | Japan       | 1996 |
| Eru4**    | Shigella phage 75/02              | NC_029120.1       | Stx1     | Hungary     | 2013 |
| Eru5      | Stx2-converting phage Stx2a_F403  | AP012529.1        | Stx2     | Japan       | 2012 |
| Eru6      | Stx2-converting phage Stx2a_WGPS2 | AP012537.1        | Stx2     | Japan       | 2012 |
| Eru7      | Stx2a-converting phage Stx2_14040 | LC567818.1        | Stx2     | Japan       | 2020 |
| Eru8      |                                   | LODB01000401.1    | Stx2     | Netherlands | 2013 |
| Eru9      |                                   | JAGEXB010000044   | Stx2     | Germany     | 2018 |
| Eru10     |                                   | LOGT01000177.1    | Stx2     | Netherlands | 2013 |
| Eru11     |                                   | LOIJ01000033.1    | Stx2     | Netherlands | 2013 |
| Eru12     |                                   | CCVP01000073.1    | Stx1     | Norway      | 2009 |
| Eru13     |                                   | AATHWC010000004.1 | Stx1     | England     | 2020 |

447 \* Eru types previously described in Llarena *et al.*, 2021 (10)

448 \*\* The Eru4 type is represented by an *stx1* carrying phage from a clinical isolate of *Shigella sonnei* from Hungary  
 449 while the rest are prophages found in *E. coli* (47).

450

451

452

453 **Table 2: Number of Eru types in the data set of 120 Stx-converting phage genomes retrieved**  
 454 **from the NCBI virus database (taxid:10239).**

| Eru type | Number | Reference  |
|----------|--------|------------|
| lambdoid | 9      | (10)       |
| Eru1     | 7      | (10)       |
| Eru2     | 57     | (10)       |
| Eru3     | 18     | (10)       |
| Eru4     | 2      | This study |
| Eru5     | 4      | This study |
| Eru6     | 3      | This study |
| Eru7     | 20     | This study |

455

456



462 **Table 4:** *Eru type of Stx phages of highly pathogenic STEC O157:H7 isolates from UK*

| Strain ID | Reference | NCBI accession no. | Year | Eru type                     |
|-----------|-----------|--------------------|------|------------------------------|
| E30228    | (48)      | VXJO00000000       | 1983 | Stx2a Eru5<br>Stx1a lambdoid |
| E34500    | (49)      | VXJN00000000       | 1983 | Stx2a Eru1<br>Stx2c Eru2     |
| E45000    | (28)      | VXJM00000000       | 1987 | Stx2a Eru2                   |
| E116508   | (28)      | VXJP00000000       | 1996 | Stx2a Eru5<br>Stx2c Eru2     |
| 315176    | (50)      | VXJQ00000000       | 2014 | Stx2a Eru2                   |
| 267849    | (51)      | VXJR00000000       | 2016 | Stx2a Eru7<br>Stx2c Eru2     |

463

464

465 **List of supplemental information**

466

467 Table S1: Stx-converting phage genomes with Eru type

468

469 Table S2: BioProjects comprising European STEC strains with Eru type

470

471 Table S3: Information about the 260 CI sequences used in phylogenetic analysis

472

473 Table S4: Percent Identity Matrix (Clustal2.1) between clades of CI repressor sequences

474

475

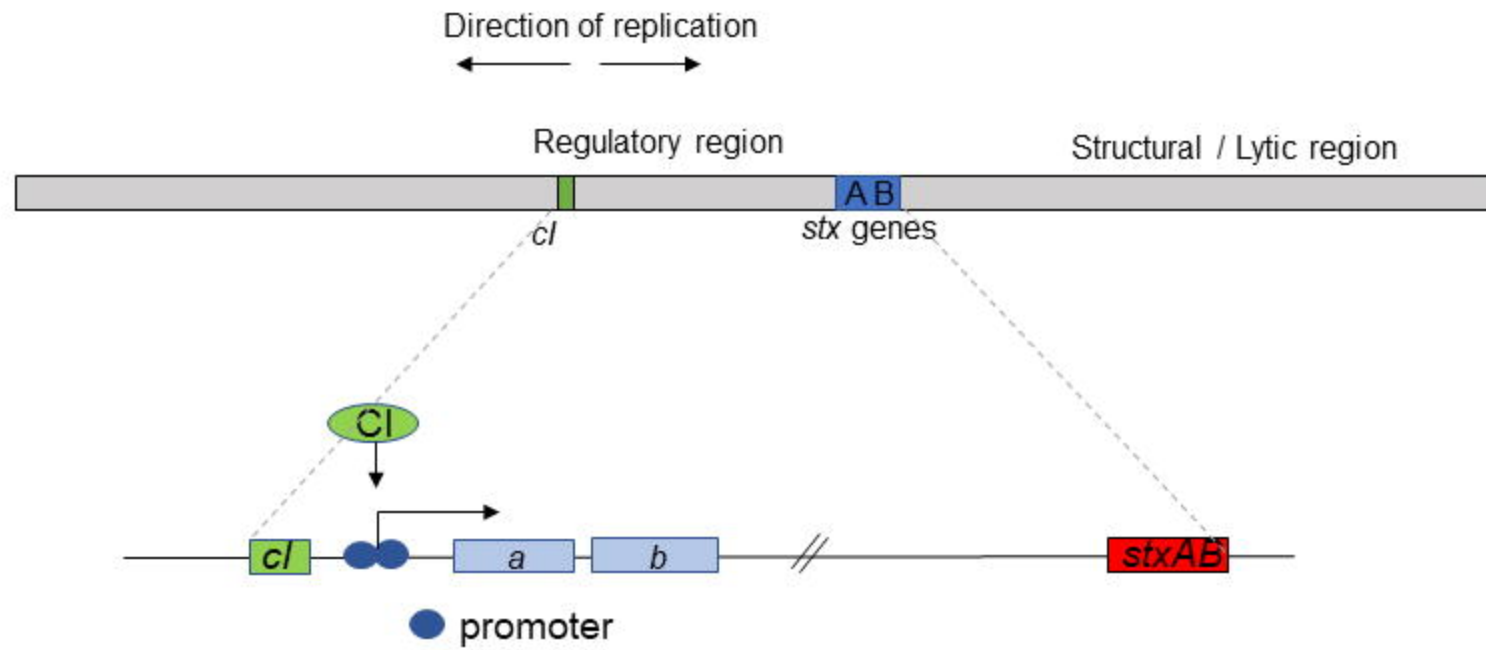

**Figure 1: A schematic overview of the genome of an Stx phage.** The boxes labeled *a* and *b* indicate the replication genes which are represented by *O* and *P* in phage lambda and by other less characterized genes in Eru1-3 (10).



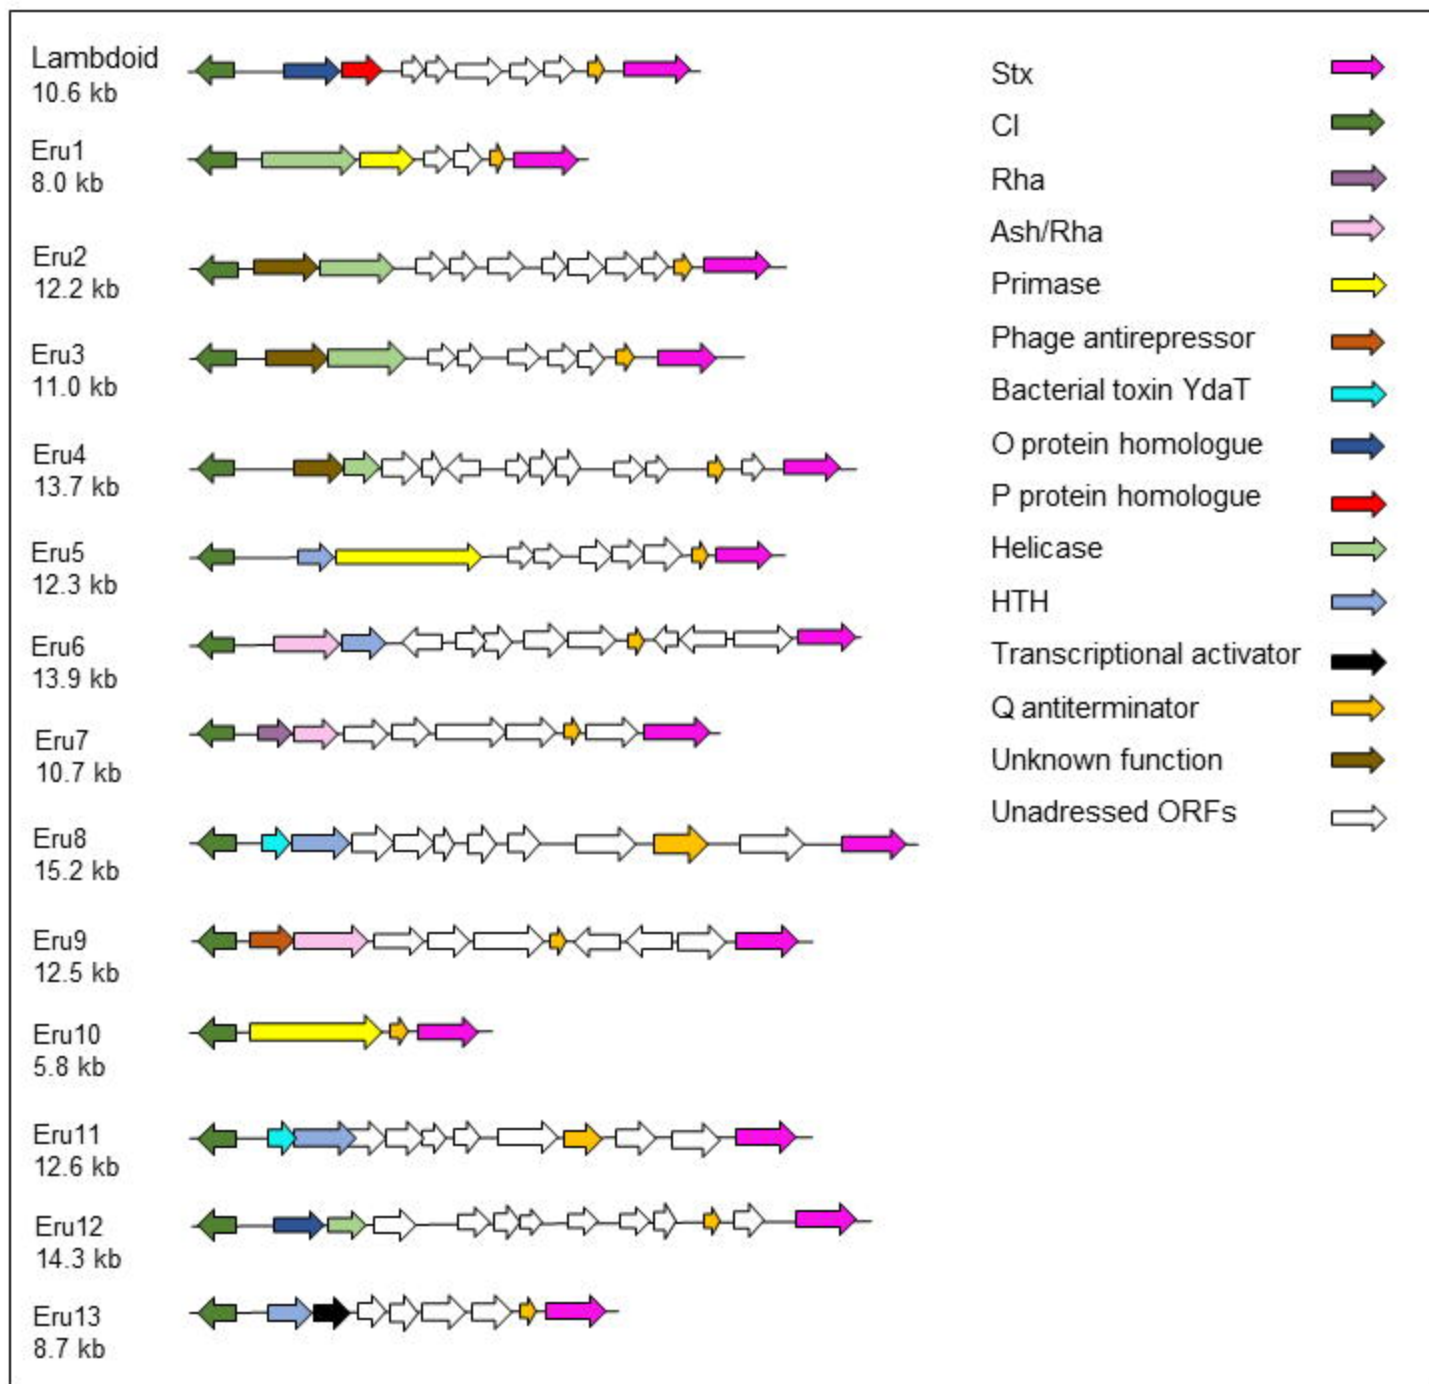

**Figure 2: Physical maps of the region between *cI* (green) and *stx* (pink).** The color code also indicates the putative function of the proteins encoded by the genes directly upstream of *cI*. White arrows indicate open reading frames (ORFs) which are not addressed in this study.

Tree scale: 1

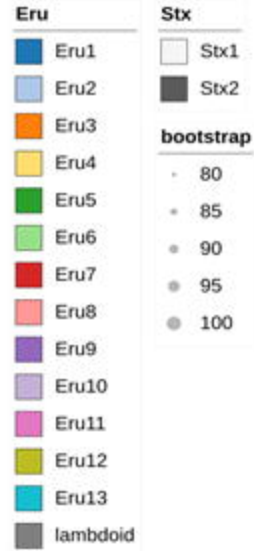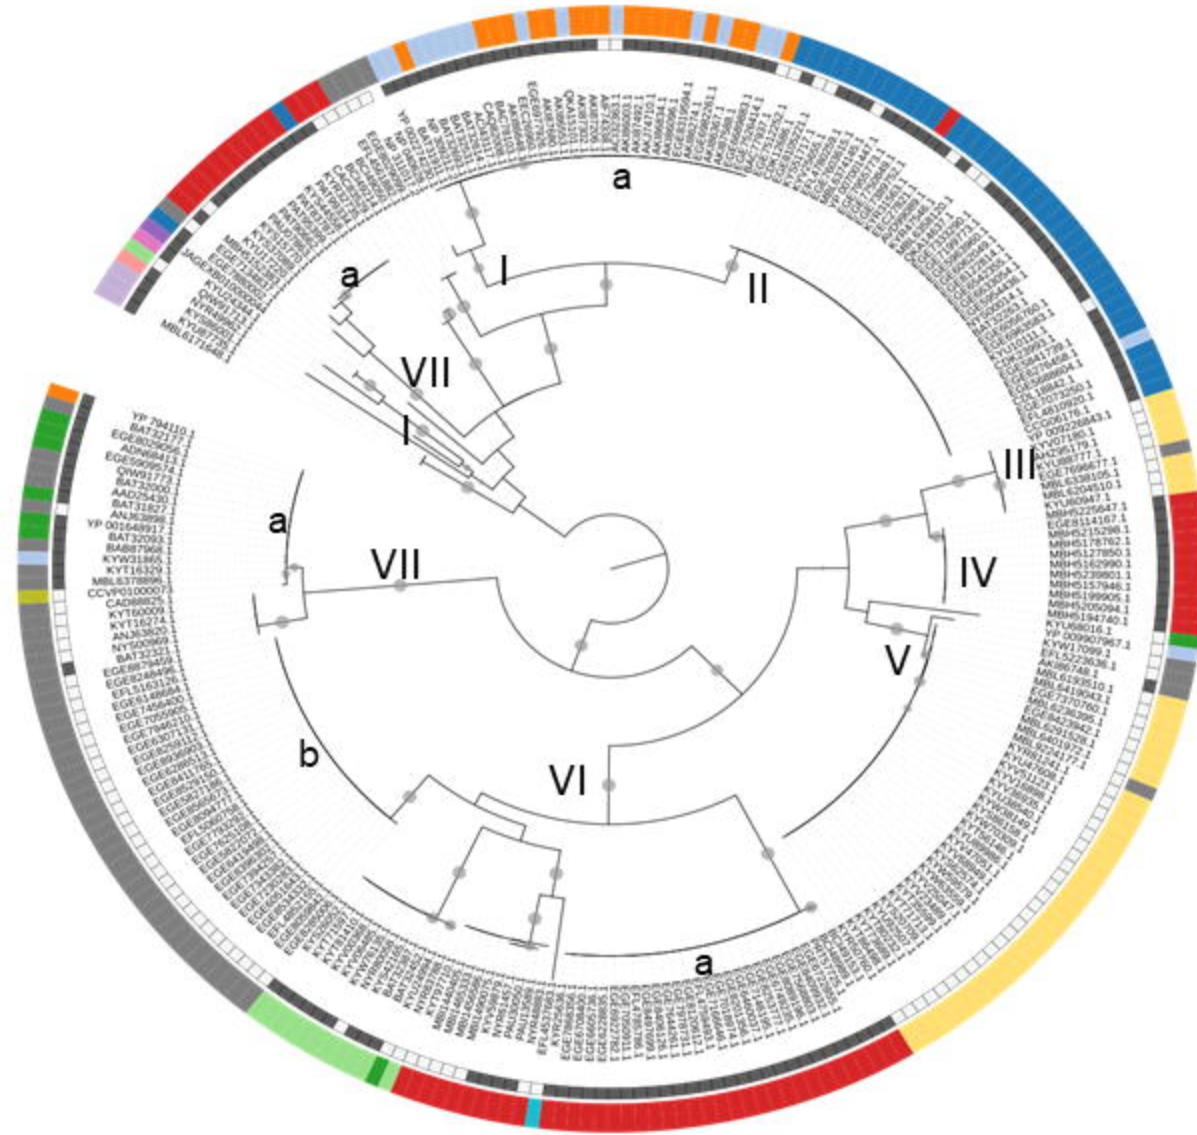

**Figure 3: Maximum-likelihood phylogeny of 260 CI protein sequences.** The tree was midpoint rooted and bootstrap values  $>80\%$  are indicated by grey circles. The Stx type is shown in the inner ring and the Eru type is shown in the outer ring. Clades that are discussed in the text are labelled with roman numerals

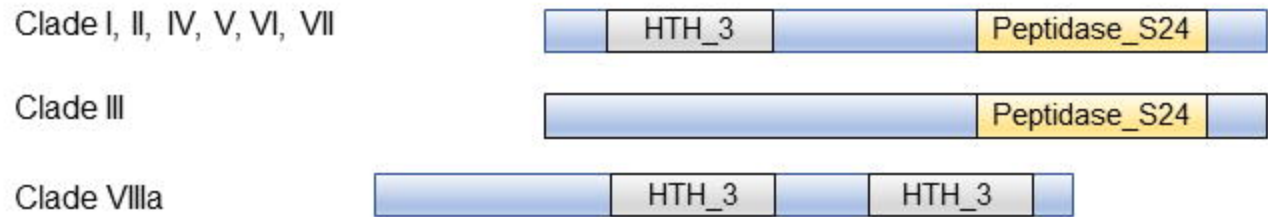

**Figure 4: Domain structures of Stx phage CI repressors of Clade I-VIII.** HTH\_3 domains (grey) and Peptidase\_S24 domains (yellow) were assigned according to Pfam.

```

Clade_I      -----MKWYELARSRMKELGIT-----QEKLAEEELGHTQGGIGHW 35
Clade_II    MNMKKKPLTPEQLEDARLKSIFNAKKEGLS-----QESLAYELGVTQSAVNQL 51
Clade_VIIa  --MVQ-----NEKVRKEFAQRLAQACKEAGLDEHGRG-----MAIARALSLSKGVSKW 47
Clade_V      -----MKTFAERLNAAMSSAGLS-----QAQLADMVGVSQPAIQKM 36
Clade_III   --MVK-----KDELKEAFSKRLQLALDAGVGGGQAKRIQNAMKLRGIDISEPGIWKW 52
Clade_IV    -----MLRTLADRLNFAMYEIIGLS-----QAQLAKAANMAOPTIWIWI 37
Clade_VIa   -----MKNVKSTENRIAMMLKTKIGLS-----QAEELARKLGVSAQSVQYV 39
Clade_VIb   -----MKKETLADRLNLAMEQSGLS-----QGALAKASGVAOPTIWIWL 38
      .               :
      .               :

Clade_I      LRGRSHPSLSDIGVVFYKYLIGIDNISFNHDGTFS-PVGEY-----SSAP 77
Clade_II    MAGINAINASHAAQLAKILNVK-----VGDFS-PSLAKSI-----AEMALAI-EPLT 97
Clade_VIIa  FNAESLPRQEKMNALAKFLNVVWVWLQHGTSLNGANDE----- 85
Clade_V      SSG-KTTGSRKMVELANALRVRPENLSSGIGSMRPPQSAEEPSNARESSLKAIAMDHQN 95
Clade_III   LNSASIPEKTSILALSDWLSVKPEWLEYGSNEP-SVKQRPSIPNESEWGSLETWDRNTPL 111
Clade_IV    ASG-NARGTTKIVDLANALGVTPEWLSGGVGSMAENKKPSIPPKSEWGKIESWDEHTPL 96
Clade_VIa   TTGKTFPRSDKLAQLSVISGYPSQSNFLGEDASST---FSSAEKHH-----T 82
Clade_VIb   TSGN-ARGSTKIVEIANALGVRTIEWLSSGIGPMRNDGGQSGKPAV-----N 83
      .               :
      .               :

Clade_I      VKKQYEPVFS-----HVQAGMFSPEL-----RTFTKGAERLVSSTTKKASDSAFWLEW 126
Clade_II    RVPAYEYPLLS-----CVQAGAFSMDD-----ISYAKDAIKWISTTTKASDRSFWLEW 146
Clade_VIIa  ----DTLSFVG--KLKKGGLVRVGEAILGVDGAIEMT-EERDGLWKIYSDD-PDAFGLRV 137
Clade_V      NDEFVALPLL-NISLSAGGGSCALEESAEEF--SLVFR-RYYLKKMGVPEKA-AKL--VRV 148
Clade_III   RDEVEVPYLKDI EFACGGDGRVHCEHNGF--KLRFS-KATLRRVGANS DG-SGVLCFPA 167
Clade_IV    SDEVEVPFLKDI EFACGTGKVIS EDHNGL--KLRFS-KATLRRIGANS DG-SGVLCFPA 152
Clade_VIa   REDSVVFNVL-DVEFSCG DGHVVRGDLIDVRSI ELD-PEYARRLVGNRAF-KNIEIGNA 139
Clade_VIb   HSKYFKIDVL-DIEVSAGPGVI-NREFVEVLRVSEYS-FDDARHMF DGRKA-ENIRIINW 139
      .               :
      .               :

Clade_I      EGSMITAPTGSKPSFPEGLILILVDPEQAVEPGDFCIARLGGDEFTFK--K---LI-RDSG 180
Clade_II    KGSMITAPQGGKPSFPEGLILILVDPEREIEDGDFCVARMNGDEFTFK--R---FI-RESG 200
Clade_VIIa  KGDSMN-----PRIKSGEYVLI EPNTKVFP GDEVFVRTIEGHNMIKVLG-----YDRDG 186
Clade_V      VGGSM E-----PTLHGDGVVGVNTQDTSIRDGKYAICQAD-----LLRVKTLIATPT- 196
Clade_III   TGGSM E-----PVIPDGTIAVD TNNKRIVDGKLYAIAQPGVGDEKLKRIKLLYRRPGG 221
Clade_IV    TGGSM E-----PIIPDGTVAID TNNKRIVDGKLYAIGQDDGCGGQLKRIKQLHRRPGG 206
Clade_VIa   RGGSM A-----PTISFGD LFLDKT VTYFDGGDIYAFCFDGE CYVK--RLQ---KIGS 187
Clade_VIb   RGGSM S-----GTIEFGD LFLVDITVKSFDGGDIYAFLYDDTAHVK--RLQ---MMKD 187
      *   *           : *   *           :
      .               :
      .               :

Clade_I      QVFLQPLNQQYPMI-----PCNE---SCSVGKVIA----SQWPE----ETFG 217
Clade_II    KAYLEPLNPRFDMI-----ECNE---NCQFVGKVIK----SQWND----ETFD 237
Clade_VIIa  EYQFTSINQDHRPITLPYHQVAKVEYVAGILKQSRHLDDIEAREWLKSS----- 235
Clade_V      SVIIRSINREEYPD----EVMNREEFYKNVKIIGR-----VFWSSHWS----- 235
Clade_III   KLIIRSINSEDPD----EEAD----TQSVEIIGK-----VFWYSVLL----- 256
Clade_IV    KLIIRSINSEDPD----EETS----IDKVDIIGR-----LFWYSVLL----- 241
Clade_VIa   KIMVLSNPNYQPW----S-IEKEG-MALLYIQSK-----VISSVPFNINRFG 229
Clade_VIb   KLLVISNKSYS PW----DPIEKDE-MNRVIFGK-----VIGSMPQTYRKHG 230
      .               :
      .               :

```

**Figure 5: Sequence alignment of Clade I-VII Stx phage CI sequences.** CI protein from Clade VIII is not included in the alignment due to large structural differences (see Fig. 4). Red boxes indicate the six amino acids that were conserved throughout all clades and the black arrow indicates the CI autocleavage residue found in this type of repressors (16).
